# Supplementary material
Source: PubMed Central journal article supplement (PMC8549732)
Supplement: spectrum00888-21_supp_1_seq10.pdf [file spectrum00888-21_supp_1_seq10.pdf]

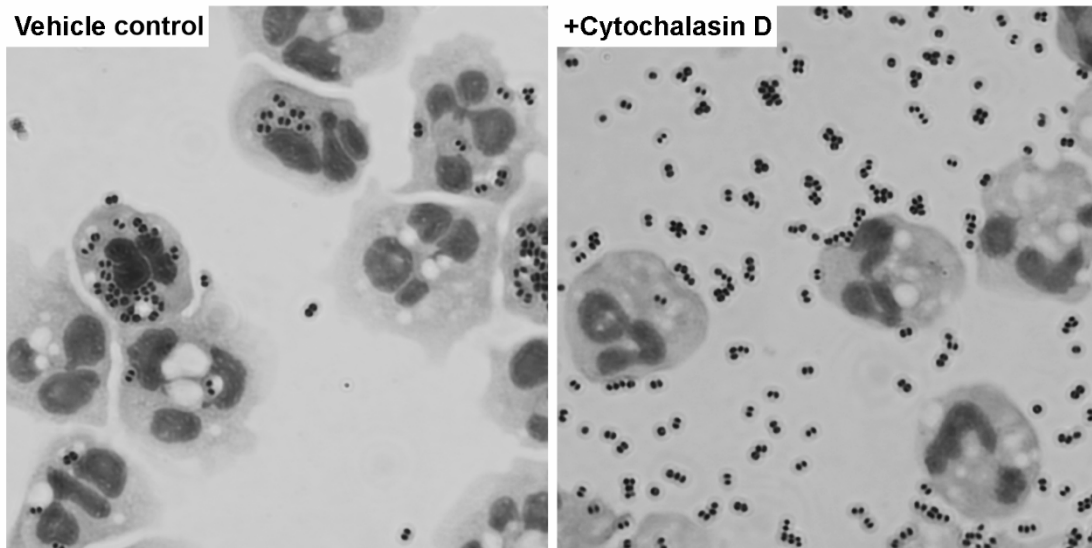

**FIG S1** Phagocytosis of strain LAC by PMNs in the absence (vehicle control) or presence of cytochalasin D as indicated. Human PMNs were incubated with 10  $\mu\text{g/ml}$  cytochalasin D for 15 min at 37°C prior to addition of bacteria. 30- $\mu\text{l}$  aliquots of each assay mixture was centrifuged onto slides with a Cytospin™ instrument and cells were visualized by using a Wright-Giemsa stain. Images are representative of six experiments and were captured by using a 100 $\times$  objective as described in Methods.

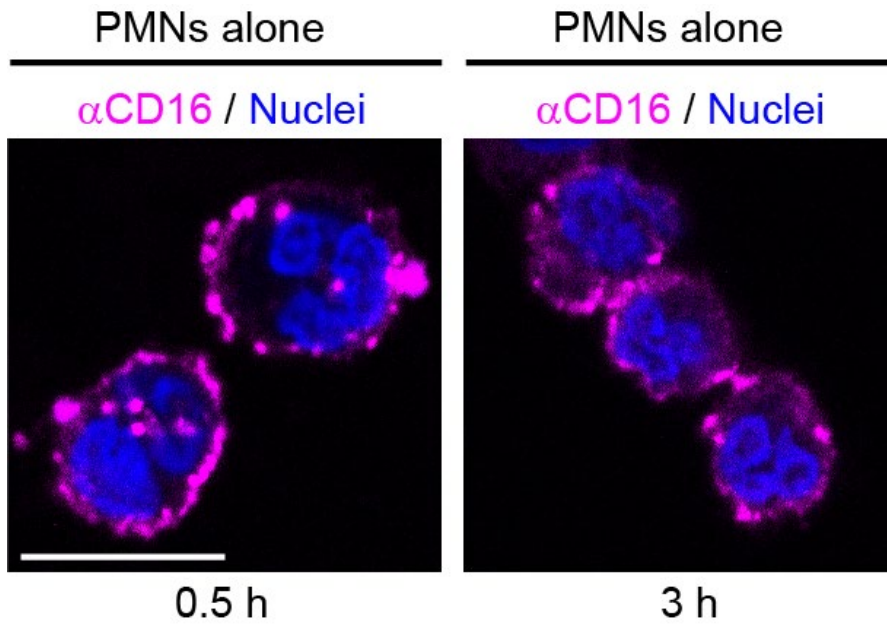

**FIG S2** Plasma membrane labeling of control PMNs with anti-CD16 antibody (pink) following culture for (0.5 h) or 3 h, as indicated. Nuclei were stained with NucBlue as described in Methods. Images are representative of control PMNs in multiple experiments. Scale bar = 10  $\mu$ m.

**TABLE S1** Quantification of microscopy data.

| <b>Time (h)</b> | <b>CD16–<br/>FITC+<br/><math>\alpha</math>Sa+</b> | <b>CD16+<br/>FITC+<br/><math>\alpha</math>Sa+</b> | <b>CD16–<br/>FITC+<br/><math>\alpha</math>Sa–</b> | <b>CD16+<br/>FITC+<br/><math>\alpha</math>Sa–</b> | <b>CD16+<br/>FITC–<br/>(no <i>Sa</i>)</b> |
|-----------------|---------------------------------------------------|---------------------------------------------------|---------------------------------------------------|---------------------------------------------------|-------------------------------------------|
| 0.5             | 0                                                 | 0                                                 | 0                                                 | 88.0 $\pm$ 2.8                                    | 12.0 $\pm$ 2.8                            |
| 1               | 2.0 $\pm$ 1.6                                     | 3.5 $\pm$ 4.4                                     | 20.5 $\pm$ 12.5                                   | 61.0 $\pm$ 13.3                                   | 13.0 $\pm$ 11.4                           |
| 2               | 2.5 $\pm$ 2.5                                     | 1.3 $\pm$ 2.5                                     | 23.0 $\pm$ 11.0                                   | 59.5 $\pm$ 12.5                                   | 13.8 $\pm$ 5.9                            |
| 3               | 14.5 $\pm$ 12.8                                   | 5.5 $\pm$ 6.2                                     | 38.2 $\pm$ 8.3                                    | 27.8 $\pm$ 11.3                                   | 14.1 $\pm$ 9.4                            |

The percentage (%) of PMNs without *S. aureus* (CD16+/FITC–), or percentage of those that stain positive or negative (+ or –) with anti-CD16 antibody (CD16+ or CD16–), FITC-labeled *S. aureus* (FITC+), and/or *S. aureus* labeled with the combination of anti-*S. aureus* IgG + goat anti-rabbit IgG conjugated to AF594 ( $\alpha$ Sa+ or  $\alpha$ Sa–) was calculated for each timepoint. Fifty PMNs per sample were evaluated and scored. Results are presented as the mean  $\pm$  SD of four experiments.
